## **Prevalence of diabetes and prediabetes among Bangladeshi adults and associated factors: Evidence from the Demographic and Health Survey, 2017-18**

Rakibul M. Islam<sup>a</sup>, Md. Nuruzzaman Khan<sup>b</sup>, John C. Oldroyd<sup>c</sup>, Juwel Rana<sup>d</sup>, Enayet K. Chowdhury<sup>a</sup>, Md Nazmul Karim<sup>a</sup>, Mohammad Bellal Hossain<sup>e</sup>

<sup>a</sup>Department of Epidemiology and Preventive Medicine, Monash University, Melbourne, Australia.

<sup>b</sup>Department of Population Sciences, Jatiya Kabi Kazi Nazrul Islam University, Mymensingh, Bangladesh.

<sup>c</sup>School of Behavioral and Health Sciences, Australian Catholic University, Fitzroy, Victoria, Australia

<sup>d</sup>Department of Public Health, School of Health and Life Sciences, North South University, Dhaka, Bangladesh

<sup>e</sup>Department of Population Sciences, University of Dhaka, Dhaka, Bangladesh.

### **Corresponding author:**

Dr. Rakibul Islam  
Department of Epidemiology and Preventative Medicine  
School of Public Health and Preventative Medicine  
Monash University  
553 St Kilda Road  
Melbourne VIC 3004  
Australia  
Tel +61 3 9903 0374  
Fax +61 3 9903 0828  
Email: [rakib.islam@monash.edu](mailto:rakib.islam@monash.edu)  
ORCID ID: 0000-0002-0889-8658

## Abstract

**Aim:** To estimate the age-standardized prevalence of diabetes and prediabetes, and to identify factors associated with these conditions at individual, household, and community levels.

**Methods:** Data from 11, 952 Bangladeshi adults aged 18+ available from the most recent nationally representative Bangladesh Demographic and Health Survey 2017-18 were used. Anthropometric measurements and fasting blood glucose samples were taken as part of the survey. Prevalence estimates of diabetes and prediabetes were age-standardised, and risk factors were identified using multilevel mix-effect Poisson regression models with robust variance.

**Results:** The overall age-standardized prevalence of diabetes was 12.8% (95%CI 11.2-14.3) (men: 12.8%, women: 12.7%), and prediabetes was 14.0% (95%CI 12.6-15.4) (men: 12.1%, women: 16.5%). Among people with diabetes, 61.5% were unaware that they had the condition, and only 35.2% were receiving treatment regularly. Factors associated with an increased risk of having diabetes were increasing age, male, overweight/obesity, hypertension, highest wealth quintile and living in Dhaka division. Individuals being underweight or currently working were less likely to develop diabetes.

**Conclusion** Diabetes and prediabetes affect a substantial proportion (over one-quarter) of the Bangladeshi adult population. Continuing surveillance and effective prevention and control measures, with a particular focus on obesity reduction and hypertension management, are urgently needed.

**Keywords:** Diabetes, prediabetes, prevalence, Bangladesh

## 1. Introduction

Diabetes mellitus remains a significant contributor to the global burden of disease[1]. People with diabetes have an increased risk of developing a number of serious life-threatening micro and macro vascular complications resulting in higher medical care costs, reduced quality of life and increased mortality[2]. The International Diabetes Federation (IDF) has estimated that 463 million adults live with diabetes worldwide in 2019, with a projected increase to 700 million by 2045[3]. Seventy-nine per cent of those with diabetes live in low- and middle-income countries (LMICs)[4]. It is projected that diabetes cases will increase by 74% in Southeast Asian countries in the next two decades, from 88 million in 2019 to 153 million by 2045[4].

In Bangladesh, there were 8.4 million adults living with diabetes in 2019, and projected to almost double (15.0 million) by 2045[4]. It is also estimated that another 3.8 million people had prediabetes in Bangladesh in 2019[4]. Studies, including a systematic review and meta-analysis, and national survey reports showed that the prevalence of diabetes among adults has increased substantially in Bangladesh, from ~5% in 2001 to ~14% in 2017[5-8].

The economic costs of diabetes are high due to the treatment of complications associated with the disease. Annual global health expenditure on diabetes was estimated to be USD 760 billion in 2019 and is projected to reach USD 845 billion by 2045 [3]. In Bangladesh, these costs have been estimated to US\$1.5 billion annually[9]. The true costs may be even higher when economic productivity loss, rather than just treatment expenditure, are included. Despite the high and increasing burden in LMICs, only 35% of global diabetes-related health

expenditure is spent in these settings[4]. Health expenditure attributable to diabetes will increase in the 21<sup>st</sup> century if no effective preventive measures are adopted[10].

It is thought that recent increases in time-variant risk factors for diabetes and prediabetes, including body mass index (BMI) and hypertension, account for the increasing prevalence in Bangladesh[6, 7, 11]. Overweight/obesity has consistently been associated with diabetes and prediabetes[12], but is modifiable through diabetes prevention lifestyle interventions[13]. Hypertension is an independent predictor of incident diabetes[14] and shares common aetiology and metabolic pathways with diabetes[15]. In countries with an ageing population and increasing urbanization, the overall burden of blood pressure-related complications such as nephropathy, neuropathy, and cardiovascular events is rising [16]

To our knowledge, the age-standardized prevalence of, and risk factors for, diabetes and prediabetes in Bangladesh using the latest Bangladesh Demographic and Health Survey (BDHS) 2017-18 data have not yet been estimated. We, therefore, aimed to estimate the age-standardized prevalence of diabetes, and prediabetes in Bangladeshi adults aged 18 years and older using the latest BDHS. We also investigated factors associated with diabetes and prediabetes in Bangladeshi adults. Results are examined in detail according to individual, household and community-level characteristics.

## **2. Subjects, materials and methods**

### **2.1. Study population and data collection**

Bangladesh, a Southeast Asian country, has a current population of 111 million aged 18 years and older[17], which ranked 10<sup>th</sup> in the world for cases of diabetes in 2019[4]. In 2017-18, the National Institute of Population Research and Training (NIPORT), the Ministry of Health and Family Welfare, Bangladesh conducted the second BDHS survey of its kind that collected data on blood pressure, fasting blood glucose (FBG) biomarker measurements, and relevant information in addition to socio-demographic characteristics[7]. The ICF International provided technical assistance as part of the Demographic and Health Survey Program, while the US Agency for International Development provided financial support.

The BDHS is a nationally representative survey conducted using a two-stage stratified sample of households, including strata for rural and urban areas. Detail survey sampling and the data collection procedure has been published in the BDHS survey report [7]. The primary sampling units (PSUs), which each contain 120 households on average, were taken from the most recent 2011 Bangladesh census enumeration areas. In BDHS 2017-18, a total of 675 PSUs were selected with probability proportional to PSU size. A total of 672 PSUs were included (three PSUs were not sampled due to flooding), of which 192 and 480 were from urban and rural areas, respectively. In the second stage, 30 households per PSU was selected using systematic random sampling to provide statistically reliable estimates of health outcomes for the country as a whole, for each of the eight divisions as well as for urban and rural areas separately. Of the 19,584 eligible households, interviews were completed in 19,457 households with an overall 99.4% household response rate. Of these, one-fourth of the selected households were interviewed, and 8,013 women and 6,691 men aged 18 years and older were selected for blood glucose measurement.

The survey, including biomarker measurements, was approved by the institutional review board of ICF and the National Research Ethics Committee of the Bangladesh Medical Research Council. Informed consent was obtained from all participants.

## **2.2. Definition of diabetes and prediabetes**

The primary outcomes in this study were diabetes and prediabetes calculated based on the fasting plasma glucose (FPG) level. The HemoCue Glucose 201 DM system with plasma conversion was used to test a drop of capillary blood obtained from consenting eligible respondents from the middle or ring finger after they had fasted overnight. The system automatically converted the fasting whole blood glucose measurements taken in the survey to FPG equivalent values[7]. The World Health Organization (WHO) criteria for diabetes and prediabetes classification were used[18]. Diabetes was defined as a FPG level greater than or equal to 7.0 mmol/L or self-reported diabetes medication use. Prediabetes was defined as a FPG level from 6.1 mmol/L to 6.9 mmol/L, without medication[18].

## **2.3. Explanatory variables**

Explanatory variables included individual, household and community-level factors. Individual-level factors included were participants' age, sex, body mass index, educational level, working status, and hypertension. The presence of hypertension was defined as a systolic blood pressure  $\geq 140$  mmHg or a diastolic blood pressure  $\geq 90$  mmHg, or currently on treatment with antihypertensive medication[19]. Household wealth quintile (lowest to highest) was the household-level factor. It was derived from the household wealth index reported in the BDHS, which was constructed using principal component analysis from household's durable and non-durable assets (e.g., televisions, bicycles, sources of drinking water, sanitation facilities

and construction materials)[20]. Community-level factors included were the place of residence and administrative divisions of the country.

## **2.4. Statistical analysis**

The crude prevalence of diabetes and prediabetes were estimated by adjusting survey sampling weight and complex survey design. To account for different age distributions between groups and over time, we derived estimates that were age-standardized to the 2011 Census population of Bangladesh using the direct method, with age categories of 18–29, 30–39, 40–49, 50–59, 60–64 and ≥65 years. Whether people with diabetes were different from people without diabetes was tested using Mann-Whitney test or chi-square test for continuous and categorical variable, respectively.

We used a multilevel Poisson regression model with a robust variance to identify factors associated with diabetes and prediabetes, and results were presented as prevalence ratio (PR) with 95% CIs. We used this model, firstly, the odds ratio estimated using logistic regression from a cross-sectional study may significantly overestimate relative risk when the outcome is common[21, 22]. Secondly, in the BDHS, individuals were nested within the household; households were nested within the PSU/cluster. Our multilevel mixed-effects Poisson regression model account for these multiple hierarchies and dependency in data, and the problem of overestimation [23]. Four models were run separately for diabetes and pre-diabetes for different sets of confounding factors at the individual, household, and community levels with progressive model-building technique. Model 1 was run without confounding factors to determine the cluster level variation of diabetes and pre-diabetes in Bangladesh. Model 2 and 3 were adjusted for individual, and individual plus household level

factors, respectively. Model 4 was the final model that included individual, household, and community-level factors simultaneously. The Intra-Class Correlation (ICC), Akaike Information Criteria (AIC) and Bayesian Information Criteria (BIC) were used for model selection. All statistical tests were two-sided, and a p-value < 0.05 was considered statistically significant. The study was designed and reported in accordance with strengthening the Reporting of Observational Studies in Epidemiology (STROBE) guidelines[24]<sup>25</sup>. All analyses were performed using statistical software packages Stata (version 15.10; Stata Corp LP, College Station, Texas).



**Figure 1:** Schematic representation of the sampling procedure of the Bangladesh Demographic and Health Survey, 2017-18

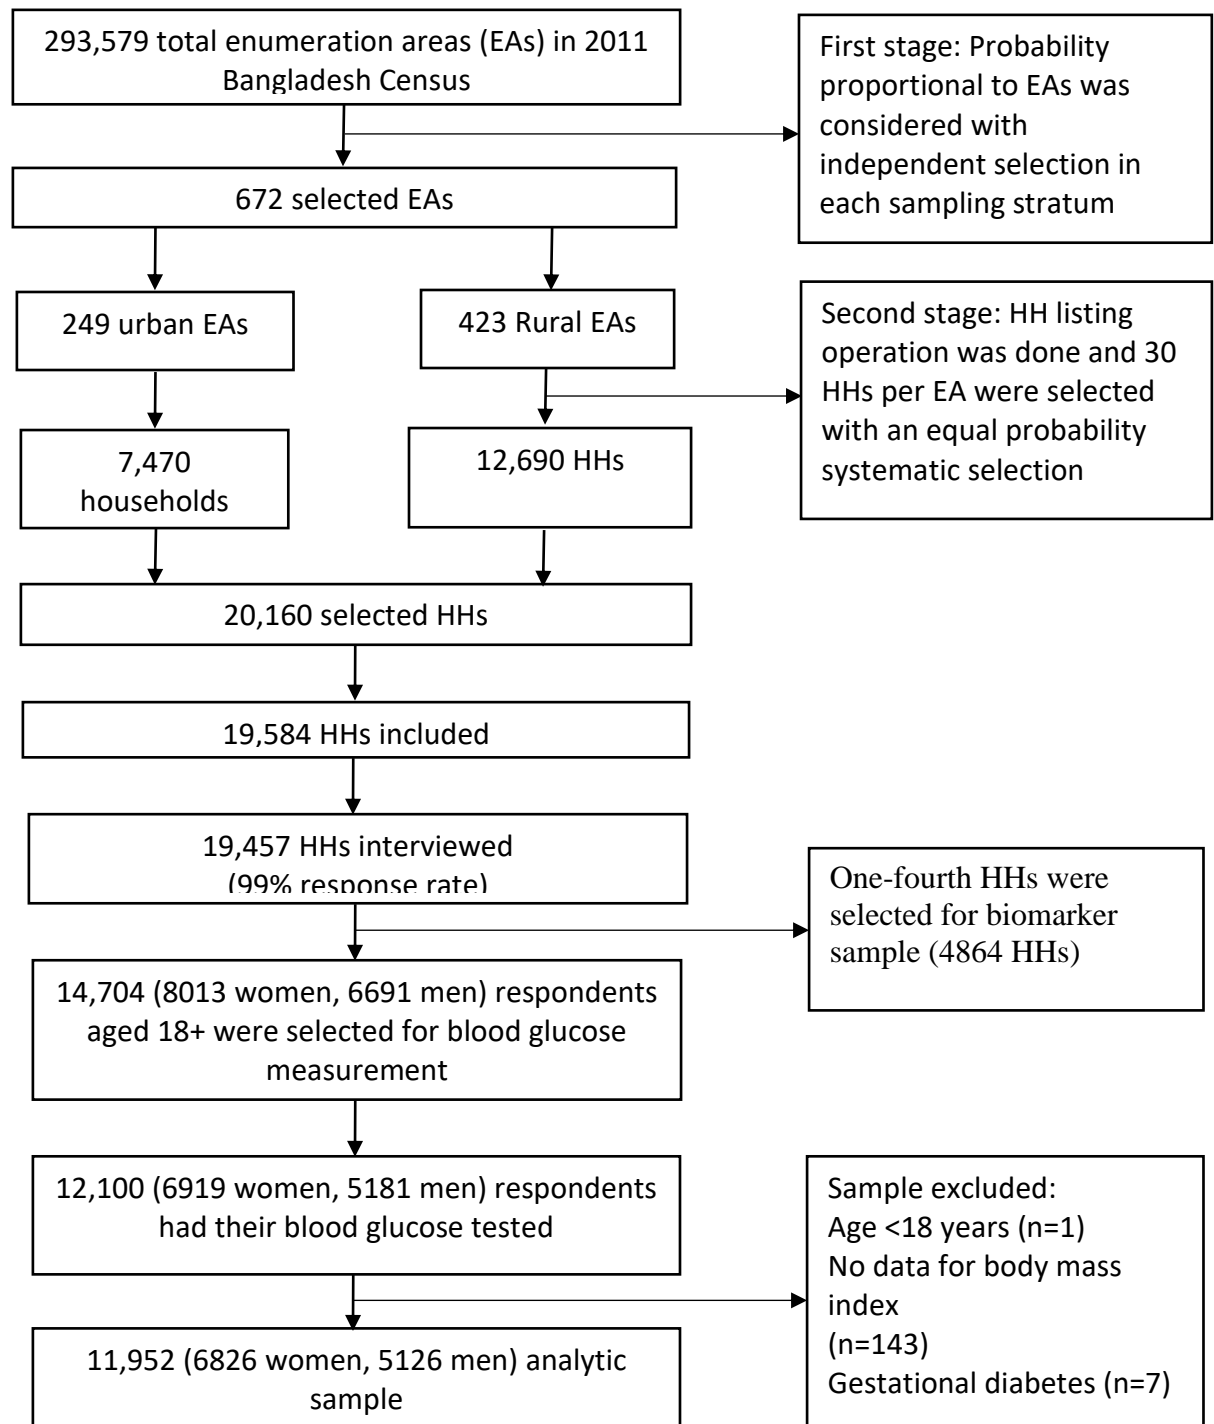

### 3. Results

Of 12,100 weighted sample who provided FBG , 11,952 were included in the analysis (Figure 1). The median (Q1-Q3) age of the participants was 36 (26-50) years (Table 1). Of the study participants, 57.1% (6,826) were female, 26.6% (3,179) lived in urban areas, about one-fourth (2,950) were overweight/obese and 27.4% (3,274) had hypertension. People with diabetes were significantly older than those without ( $p < 0.001$ ), they were significantly more likely to be overweight or obese ( $p < 0.001$ ), more likely to be hypertensive ( $p < 0.001$ ). Furthermore, people with diabetes were more likely to live in urban areas and come from a household with higher wealth quintiles ( $p < 0.001$ ) (Table 1).

The crude and age-standardized prevalence of diabetes and prediabetes by individual, household and community level characteristics are presented in Table 2. The overall age-standardized prevalence of diabetes was 12.8% (95%CI, 11.2-14.3%) with comparable estimates for men: 12.8%, 95%CI 10.8-14.7 and women: 12.7%, 95%CI 10.9-14.5. The age-standardized diabetes prevalence was higher in urban (12.0%, 95%CI 11.0-12.9) than in rural residents (8.4%, 95%CI 7.7-9.0). It was highest in people who were obese (19.7%, 95%CI 16.2-23.1), hypertensive (16.1%, 95%CI 14.8-17.3), in the highest wealth quintile (17.3%, 95%CI 15.9-18.8) and living in the Dhaka division (14.8%, 95%CI 13.1-16.6) compared to respective reference categories.

**Table 1: Characteristics of the study population aged ≥18 years in Bangladesh, BDHS 2017-18**

| Characteristics                           | N (%) <sup>a</sup> |                                    |                                | P-value <sup>b</sup> |
|-------------------------------------------|--------------------|------------------------------------|--------------------------------|----------------------|
|                                           | All<br>(N=11,952)  | No. without diabetes<br>(N=10,778) | No. with diabetes<br>(N=1,174) |                      |
| <b>Individual level</b>                   |                    |                                    |                                |                      |
| <b>Age in years, Median (Q1-Q3)</b>       | 39 (26-50)         | 35 (26-49)                         | 46 (35-58)                     | <0.001               |
| 18-34                                     | 5,391 (45.11)      | 5,114 (47.45)                      | 277 (23.62)                    |                      |
| 35-39                                     | 1,371 (11.47)      | 1,233 (11.44)                      | 138 (11.73)                    |                      |
| 40-44                                     | 1,047 (8.76)       | 916 (8.50)                         | 131 (11.18)                    |                      |
| 45-49                                     | 994 (8.31)         | 861 (7.99)                         | 133 (11.32)                    |                      |
| 50-54                                     | 672 (5.62)         | 556 (5.16)                         | 115 (9.84)                     |                      |
| 55-59                                     | 676 (5.66)         | 577 (5.35)                         | 100 (8.50)                     |                      |
| 60-64                                     | 675 (5.65)         | 563 (5.23)                         | 112 (9.50)                     |                      |
| ≥65                                       | 1,126 (9.42)       | 958 (8.89)                         | 168 (14.30)                    |                      |
| <b>Sex</b>                                |                    |                                    |                                |                      |
| Male                                      | 5,126 (42.89)      | 4,589 (42.57)                      | 537 (45.77)                    | 0.550                |
| Female                                    | 6,826 (57.11)      | 6,189 (57.43)                      | 637 (54.23)                    |                      |
| <b>Body Mass Index (kg/m<sup>2</sup>)</b> |                    |                                    |                                |                      |
| Underweight (<18.5)                       | 2,067 (17.29)      | 1,938 (17.98)                      | 129 (10.94)                    | <0.001               |
| Normal (18.5-24.9)                        | 6,935 (58.03)      | 6,348 (58.90)                      | 587 (50.03)                    |                      |
| Overweight (25-29.9)                      | 2,448 (20.48)      | 2,088 (19.37)                      | 360 (30.72)                    |                      |
| Obese (≥30)                               | 502 (4.20)         | 404 (3.75)                         | 98 (8.31)                      |                      |
| <b>Level of education</b>                 |                    |                                    |                                |                      |
| No education/preschool                    | 3,033 (25.37)      | 2,736 (25.39)                      | 296 (25.22)                    | 0.937                |
| Primary education                         | 3,590 (30.04)      | 3,225 (29.92)                      | 365 (31.12)                    |                      |
| Secondary education                       | 3,539 (29.61)      | 3,203 (29.72)                      | 337 (28.68)                    |                      |
| Higher education                          | 1,790 (14.98)      | 1,614 (14.98)                      | 176 (14.98)                    |                      |
| <b>Currently working</b>                  |                    |                                    |                                |                      |
| Yes                                       | 4,621 (38.67)      | 6,695 (62.12)                      | 636 (54.14)                    | <0.001               |
| No                                        | 7,331 (61.33)      | 4,083 (37.88)                      | 538 (45.86)                    |                      |
| <b>Hypertension</b>                       |                    |                                    |                                |                      |
| Yes                                       | 3,416 (28.58)      | 2,865 (26.58)                      | 551 (46.91)                    | <0.001               |
| No                                        | 8,536 (71.42)      | 7,913 (73.42)                      | 623 (53.09)                    |                      |
| <b>Household level</b>                    |                    |                                    |                                |                      |
| <b>Wealth quintile</b>                    |                    |                                    |                                |                      |
| Lowest                                    | 2,311 (19.34)      | 2,183 (20.25)                      | 128 (10.92)                    | <0.001               |
| Second                                    | 2,354 (19.70)      | 2,213 (20.53)                      | 141 (12.00)                    |                      |
| Middle                                    | 2,466 (20.63)      | 2,272 (21.08)                      | 194 (16.51)                    |                      |
| Fourth                                    | 2,377 (19.89)      | 2,111 (19.59)                      | 266 (22.66)                    |                      |
| Highest                                   | 2,444 (20.45)      | 1,999 (18.54)                      | 445 (37.92)                    |                      |
| <b>Community level</b>                    |                    |                                    |                                |                      |
| <b>Place of residence</b>                 |                    |                                    |                                |                      |
| Urban                                     | 3,179 (26.60)      | 2,764 (25.64)                      | 416 (35.39)                    | <0.001               |
| Rural                                     | 8,773 (73.40)      | 8,014 (74.36)                      | 758 (64.61)                    |                      |
| <b>Administrative division</b>            |                    |                                    |                                |                      |
| Barishal                                  | 660 (5.52)         | 597 (5.54)                         | 62 (5.31)                      | <0.001               |
| Chattogram                                | 2,053 (17.17)      | 1,828 (16.96)                      | 224 (19.13)                    |                      |
| Dhaka                                     | 2,767 (23.15)      | 2,373 (22.02)                      | 394 (33.56)                    |                      |
| Khulna                                    | 1,489 (12.46)      | 1,368 (12.69)                      | 121 (10.34)                    |                      |
| Mymensingh                                | 973 (8.14)         | 897 (8.32)                         | 77 (6.54)                      |                      |
| Rajshahi                                  | 1,727 (14.45)      | 1,590 (14.75)                      | 138 (11.72)                    |                      |
| Rangpur                                   | 1,503 (12.58)      | 1,419 (13.17)                      | 84 (7.12)                      |                      |
| Sylhet                                    | 780 (6.53)         | 706 (6.55)                         | 74 (6.27)                      |                      |

BDHS= Bangladesh Demographic and Health Survey; Q= quartile.

<sup>a</sup>All values represent absolute numbers and percentages unless otherwise stated.

<sup>b</sup>P-values were derived using a Mann Whitney test or chi-square test for continuous and categorical variables, respectively.

The overall age-standardized prevalence of prediabetes was 14.0% (95%CI, 12.6-15.4) with a higher prevalence in women (16.5%, 95%CI 14.8-18.1) than men (12.1%, 95%CI 10.5-13.8). The age-standardized prevalence estimates of prediabetes were also higher in people those were obese, in the highest wealth quintile, living in urban areas, and in the Dhaka division (Table 2). Three out of five (61.5%, 95%CI 57.9-64.9) people living with diabetes did not know that they had it and only a third (35.2%, 95%CI 32.0-38.5) were receiving appropriate treatment.

**Table 2: Crude and age-standardized prevalence of diabetes and prediabetes in adults aged ≥18 years in Bangladeshi population, BDHS 2017-18**

|                                           | Diabetes, % (95% CI) |                          | Prediabetes, % (95% CI) |                          |
|-------------------------------------------|----------------------|--------------------------|-------------------------|--------------------------|
|                                           | Crude prevalence     | Standardized prevalence* | Crude prevalence        | Standardized prevalence* |
| <b>Overall</b>                            | 9.82 (9.11-10.58)    | 12.75 (11.19-14.31)      | 14.18 (13.29-15.13)     | 14.01 (12.59-15.44)      |
| <b>Individual level</b>                   |                      |                          |                         |                          |
| <b>Age (years)</b>                        |                      |                          |                         |                          |
| 18-34                                     | 5.14 (4.43-5.96)     | 5.12 (4.53-5.70)         | 12.71 (11.54-13.97)     | 11.50 (10.65-12.35)      |
| 35-39                                     | 10.04 (8.35-12.03)   | 9.98 (8.41-11.55)        | 15.57 (13.49-17.91)     | 15.18 (13.30-17.06)      |
| 40-44                                     | 12.53 (10.36-15.09)  | 11.78 (9.83-13.72)       | 15.61 (13.10-18.50)     | 14.91 (12.76-17.06)      |
| 45-49                                     | 13.37 (11.20-15.90)  | 12.88 (10.83-14.93)      | 15.72 (13.43-18.31)     | 15.41 (13.20-17.63)      |
| 50-54                                     | 17.20 (14.16-20.73)  | 16.37 (13.58-19.16)      | 14.34 (11.63-17.57)     | 14.75 (12.08-17.42)      |
| 55-59                                     | 14.75 (12.03-17.97)  | 15.90 (13.17-18.62)      | 15.71 (12.95-18.93)     | 15.32 (12.63-18.00)      |
| 60-64                                     | 16.52 (13.68-19.82)  | 15.28 (12.59-17.98)      | 15.75 (12.81-19.23)     | 15.43 (12.73-18.13)      |
| ≥65                                       | 14.90 (12.60-17.53)  | 14.84 (12.79-16.89)      | 14.93 (12.51-17.72)     | 14.75 (12.71-16.80)      |
| <b>Sex</b>                                |                      |                          |                         |                          |
| Men                                       | 10.48 (9.54-11.50)   | 12.75 (10.79-14.71)      | 13.95 (12.81-15.18)     | 12.14 (10.50-13.78)      |
| Women                                     | 9.32 (8.49-10.23)    | 12.72 (10.91-14.53)      | 14.36 (13.26-15.53)     | 16.45 (14.83-18.07)      |
| <b>Body Mass Index (kg/m<sup>2</sup>)</b> |                      |                          |                         |                          |
| Underweight (<18.5)                       | 6.21 (5.04-7.63)     | 5.53 (4.55-6.51)         | 12.47 (10.78-14.39)     | 11.73 (10.35-13.11)      |
| Normal (18.5-24.99)                       | 8.47 (7.70-9.30)     | 8.31 (7.67-8.96)         | 13.41 (12.36-14.53)     | 12.58 (11.80-13.35)      |
| Overweight (25-29.99)                     | 14.72 (13.16-16.43)  | 14.77 (13.38-16.16)      | 16.35 (14.70-18.13)     | 15.88 (14.45-17.31)      |
| Obese (≥30)                               | 19.44 (15.81-23.68)  | 19.65 (16.23-23.08)      | 21.40 (17.67-25.68)     | 21.19 (17.67-24.71)      |
| <b>Level of education</b>                 |                      |                          |                         |                          |
| No education, preschool                   | 9.76 (8.57-11.09)    | 9.45 (8.39-10.50)        | 14.85 (13.22-16.64)     | 13.87 (12.62-15.11)      |
| Primary                                   | 10.17 (8.98-11.50)   | 9.77 (8.81-10.73)        | 13.43 (12.13-14.84)     | 12.98 (11.89-14.06)      |
| Secondary                                 | 9.51 (8.41-10.74)    | 9.56 (8.59-10.53)        | 14.27 (12.84-15.82)     | 13.29 (12.16-14.41)      |
| Higher education                          | 9.82 (8.26-11.63)    | 9.93 (8.62-11.25)        | 14.41 (12.55-16.50)     | 14.20 (12.67-15.73)      |
| <b>Currently working</b>                  |                      |                          |                         |                          |
| Yes                                       | 8.67 (7.93-9.46)     | 8.53 (7.89-9.16)         | 13.46 (12.45-14.53)     | 12.83 (12.07-13.59)      |
| No                                        | 11.64 (10.50-12.89)  | 11.43 (10.52-12.33)      | 15.34 (13.99-16.79)     | 14.51 (12.07-13.59)      |
| <b>Hypertension</b>                       |                      |                          |                         |                          |
| Yes                                       | 16.43 (14.95-18.03)  | 16.05 (14.84-17.26)      | 14.95 (13.52-16.49)     | 14.57 (13.39-15.75)      |
| No                                        | 7.32 (6.61-8.10)     | 7.03 (6.50-7.55)         | 13.90 (12.90-14.96)     | 13.06 (12.35-13.77)      |
| <b>Household level</b>                    |                      |                          |                         |                          |
| <b>Wealth quintile</b>                    |                      |                          |                         |                          |
| Lowest                                    | 5.54 (4.45-6.89)     | 5.54 (4.62-6.47)         | 11.87 (10.14-13.84)     | 11.43 (10.14-12.71)      |
| Second                                    | 5.98 (4.95-7.22)     | 5.83 (4.87-6.78)         | 10.28 (8.84-11.92)      | 10.35 (9.10-11.59)       |
| Middle                                    | 7.85 (6.67-9.23)     | 7.85 (6.77-8.92)         | 11.75 (10.15-13.57)     | 11.30 (10.03-12.56)      |
| Fourth                                    | 11.18 (9.68-12.89)   | 10.57 (9.34-11.81)       | 16.21 (14.36-18.24)     | 14.72 (13.30-16.15)      |
| Highest                                   | 18.21 (16.46-20.09)  | 17.34 (15.91-18.77)      | 20.62 (18.67-22.71)     | 18.83 (17.35-20.30)      |
| <b>Community level</b>                    |                      |                          |                         |                          |
| <b>Place of residence</b>                 |                      |                          |                         |                          |
| Urban                                     | 13.06 (11.77-14.48)  | 11.96 (10.99-12.92)      | 17.73 (16.02-19.58)     | 15.20 (14.13-16.27)      |
| Rural                                     | 8.64 (7.81-9.56)     | 8.37 (7.76-8.99)         | 12.90 (11.87-14.00)     | 12.53 (11.79-13.26)      |
| <b>Administrative division</b>            |                      |                          |                         |                          |
| Barishal                                  | 9.45 (7.53-11.78)    | 9.96 (8.31-11.61)        | 16.32 (13.55-19.52)     | 16.92 (14.85-18.98)      |
| Chattogram                                | 10.93 (9.02-13.19)   | 11.07 (9.55-12.59)       | 14.61 (12.69-16.76)     | 14.72 (13.00-16.43)      |
| Dhaka                                     | 14.23 (12.25-16.48)  | 14.84 (13.09-16.59)      | 22.02 (19.27-25.05)     | 22.70 (20.64-24.76)      |
| Khulna                                    | 8.15 (6.84-9.69)     | 8.87 (7.51-10.24)        | 10.63 (8.76-12.86)      | 10.42 (8.96-11.89)       |
| Mymensingh                                | 7.89 (6.25-9.90)     | 8.07 (6.63-9.51)         | 12.24 (10.50-14.23)     | 12.43 (10.68-14.17)      |
| Rajshahi                                  | 7.96 (6.41-9.85)     | 8.49 (7.12-9.86)         | 9.69 (7.82-11.95)       | 9.43 (8.00-10.87)        |
| Rangpur                                   | 5.56 (4.41-7.00)     | 6.05 (4.87-7.24)         | 9.02 (7.26-11.14)       | 9.31 (7.87-10.74)        |
| Sylhet                                    | 9.43 (7.26-12.18)    | 9.69 (8.16-11.22)        | 12.56 (10.48-14.98)     | 12.47 (10.76-14.18)      |

BDHS= Bangladesh Demographic and Health Survey; CI=confidence interval.

Data are % (95% CI). All CIs were logit transformed. \*Standardized to the 2011 Bangladesh Census population by age for the total population. Diabetes is defined as a fasting blood glucose level ≥7.0 mmol/L or self-reported diabetes medication use. Prediabetes is defined as a fasting blood glucose level from 6.1 mmol/L to 6.9 mmol/L, without medication.

In each of the four mixed-effects multilevel Poisson models to identify factors associated with diabetes and pre-diabetes, we compared intra-class correlation (ICC), Akaike's information criterion (AIC), and Bayesian information criterion (BIC) to select the best fitting model. The preferred model was the one that had the smallest ICC, AIC and BIC. According to these indicators, Model 4 (including individual, household and community-level factors) had the best model fit. The first (the null model), which included none of the covariates, produced an ICC of 30.52% and 42.54% variance in diabetes and prediabetes, respectively (Table 3). This indicates the degree of the variance seen across community clusters without taking other factors into account. However, the ICC was reduced to about 12.42% for diabetes and 14.89% for pre-diabetes once individual, household and community level factors were included in the final model.

The results for model 4 (final model), adjusted for individual, household, and community-level factors, are shown in Table 4, while the results for all other models are shown in Supplementary Table 1. There was a positive association between increasing age and the risk of developing diabetes. Furthermore, diabetes was associated with sex, BMI, working status, hypertension, wealth quintile and administrative division of the country but not with the place of residence (urban /rural), or level of education. Compared with individuals aged 18 to 34 years, individuals aged 40 to 49 years were over 2 times, while individuals aged  $\geq 50$  years were about 3 times more likely to develop diabetes (Table 4). Compared with women, men were at greater risk of developing diabetes (PR 1.17, 95%CI 1.01-1.36). The risk of diabetes was significantly positively associated with being overweight (PR 1.30, 95%CI 1.13-1.50) or obese (PR 1.42, 95%CI 1.14-1.78) compared with normal weight, being hypertensive (PR 1.47,

95%CI 1.29-1.67) compared with normotensive, belonging to either of the fourth (PR 1.61, 95%CI 1.24-2.10); or the highest wealth quintile (PR 2.22, 95%CI 1.71-2.87), compared with the lowest quintile, and living in the Dhaka division (PR 1.31, 95%CI 1.02-1.70) compared with Barishal division. Being underweight (PR 0.80, 95%CI 0.65-0.99), currently employed (PR 0.80, 95%CI 0.69-0.94) and living in Rangpur division (PR 0.67, 95%CI 0.50-0.90) were appeared as protective factors for diabetes.

The fully adjusted model showed that compared with the younger age group, individuals aged between 35 to 39 years and 55 to 59 years were about 15% to 25% more risk of having prediabetes. Being obese (PR 1.28, 95%CI 1.04-1.58), and belonging to the highest wealth quintile (PR 1.37, 95%CI 1.11-1.69) were associated with prediabetes. People living in Khulna, Mymensingh, Rajshahi, Rangpur and Sylhet divisions were less likely to develop prediabetes compared to Barishal division. Sex, level of education, working status, hypertension and place of residence were not associated with prediabetes.

**Table 3: Results from the random intercept model (measure of variation) at cluster/community level for diabetes and prediabetes in adults aged ≥18 years in Bangladeshi population, BDHS 2017-18**

|                                                                 | Diabetes <sup>‡</sup> |             |             |             | Prediabetes <sup>‡</sup> |             |             |             |
|-----------------------------------------------------------------|-----------------------|-------------|-------------|-------------|--------------------------|-------------|-------------|-------------|
| Random effects (measure of variation for diabetes) <sup>a</sup> | Model 1               | Model 2     | Model 3     | Model 4     | Model 1                  | Model 2     | Model 3     | Model 4     |
| Cluster-level variance (SE) <sup>b</sup>                        | 0.31 (0.04)           | 0.23 (0.04) | 0.15 (0.04) | 0.13 (0.04) | 0.28 (0.03)              | 0.26 (0.03) | 0.21 (0.03) | 0.15 (0.03) |
| Intra-class correlation (ICC, %)                                | 30.52%                | 22.67%      | 15.48%      | 12.42%      | 42.54%                   | 25.37%      | 20.55%      | 14.89%      |
| Explained variance (PCV)(%)                                     | Reference             | 25.81%      | 51.61%      | 61.29%      | Reference                | 7.14%       | 25.00%      | 46.42%      |
| <b>Model summary</b>                                            |                       |             |             |             |                          |             |             |             |
| AIC                                                             | 7695.98               | 7267.24     | 7176.80     | 7157.00     | 9857.34                  | 9849.54     | 9801.48     | 9734.92     |
| BIC                                                             | 7710.79               | 7400.52     | 7339.71     | 7379.15     | 9872.15                  | 9982.83     | 9964.39     | 9957.07     |

<sup>‡</sup> Models are based on multilevel mixed-effect Poisson regression.

<sup>a</sup>We assume that the within cluster-level random effects are equal for the ‘moderate’ and ‘highest’ levels; therefore, only between cluster-level variance estimates are reported. <sup>b</sup>Significance of random effects evaluated by comparing the model with a similar one in which random effects were constrained to zero.

Model 1 is the null model, a baseline model without any determinant variable

Model 2 is adjusted for individual level factors

Model 3 is adjusted for individual level plus household level factors

Model 4 is adjusted for individual level plus household level plus community level factors

The results of all models are presented in Supplementary Table 1 and the results of the final model are presented in Table 4.

AIC= Akaike’s Information Criterion; BDHS= Bangladesh Demographic and Health Survey; BIC= Bayesian Information Criteria; SE= Standard Error.



**Table 4: Factors associated with diabetes and prediabetes in adults aged ≥18 years in Bangladeshi population, BDHS 2017-18**

| Characteristics                                                 | Diabetes, PR (95% CI) <sup>‡</sup> | Prediabetes, PR (95% CI) <sup>‡</sup> |
|-----------------------------------------------------------------|------------------------------------|---------------------------------------|
| <b>Individual level</b>                                         |                                    |                                       |
| <b>Age in years, (ref: 18-34)</b>                               |                                    |                                       |
| 35-39                                                           | 1.81 (1.45-2.25)***                | 1.20 (1.01-1.42)*                     |
| 40-44                                                           | 2.38 (1.88-3.00)***                | 1.23 (1.02-1.49)*                     |
| 45-49                                                           | 2.39 (1.90-3.01)***                | 1.22 (1.03-1.46)*                     |
| 50-54                                                           | 3.20 (2.48-4.11)***                | 1.13 (0.90-1.42)                      |
| 55-59                                                           | 2.71 (2.13-3.44)***                | 1.26 (1.01-1.58)*                     |
| 60-64                                                           | 3.12 (2.47-3.93)***                | 1.26 (1.00-1.59)*                     |
| ≥65                                                             | 2.76 (2.15-3.54)***                | 1.21 (0.99-1.49)                      |
| <b>Sex, (ref: women)</b>                                        | 1.17 (1.01-1.36)*                  | 0.98 (0.87-1.10)                      |
| <b>Body Mass Index (kg/m<sup>2</sup>), (ref: normal weight)</b> |                                    |                                       |
| Underweight (<18.5)                                             | 0.80 (0.65-0.99)*                  | 0.95 (0.82-1.11)                      |
| Overweight (25-29.9)                                            | 1.30 (1.13-1.50)***                | 1.08 (0.95-1.22)                      |
| Obese (≥30)                                                     | 1.42 (1.14-1.78)***                | 1.28 (1.04-1.58)*                     |
| <b>Level of education, (ref: higher education)</b>              |                                    |                                       |
| No education, preschool                                         | 0.93 (0.74-1.17)                   | 1.15 (0.94-1.41)                      |
| Primary                                                         | 1.16 (0.94-1.42)                   | 1.04 (0.87-1.23)                      |
| Secondary                                                       | 1.08 (0.89-1.30)                   | 1.04 (0.88-1.23)                      |
| <b>Currently working, (ref: no)</b>                             | 0.80 (0.69-0.94)*                  | 1.01 (0.90-1.14)                      |
| <b>Hypertension, (ref: no)</b>                                  | 1.47 (1.29-1.67)***                | 0.98 (0.87-1.10)                      |
| <b>Household level</b>                                          |                                    |                                       |
| <b>Wealth quintile, (ref: lowest)</b>                           |                                    |                                       |
| Second                                                          | 1.03 (0.79-1.35)                   | 0.84 (0.68-1.03)                      |
| Middle                                                          | 1.24 (0.96-1.61)                   | 0.94 (0.77-1.15)                      |
| Fourth                                                          | 1.61 (1.24-2.10)***                | 1.17 (0.95-1.43)                      |
| Highest                                                         | 2.22 (1.71-2.87)***                | 1.37 (1.11-1.69)***                   |
| <b>Community level</b>                                          |                                    |                                       |
| <b>Place of residence, (ref: rural)</b>                         |                                    |                                       |
| <b>Administrative division, (ref: Barishal)</b>                 | 1.02 (0.89-1.18)                   | 1.00 (0.88-1.14)                      |
| Chattogram                                                      | 0.98 (0.74-1.29)                   | 0.82 (0.66-1.03)                      |
| Dhaka                                                           | 1.31 (1.02-1.70)*                  | 1.18 (0.94-1.49)                      |
| Khulna                                                          | 0.77 (0.59-1.01)                   | 0.59 (0.46-0.77)***                   |
| Mymensingh                                                      | 0.94 (0.70-1.26)                   | 0.74 (0.59-0.93)***                   |
| Rajshahi                                                        | 0.90 (0.67-1.20)                   | 0.57 (0.43-0.75)***                   |
| Rangpur                                                         | 0.67 (0.50-0.90)***                | 0.54 (0.42-0.71)***                   |
| Sylhet                                                          | 0.99 (0.72-1.37)                   | 0.73 (0.56-0.94)***                   |

<sup>‡</sup> The final model adjusted for the individual, household, and the community level factors using multilevel mixed-effect Poisson regression. The results of all models are presented in Supplementary Table 1.

BDHS= Bangladesh Demographic and Health Survey; PR= prevalence ratio; CI= confidence interval.

\*p value <0.05

\*\*\*p value <0.01

**Supplementary table 1: Factors associated with diabetes and prediabetes in adults aged ≥18 years in Bangladeshi population, BDHS 2017-18**

| Characteristics                                                 | Diabetes, PR (95% CI) |                     |                     | Pre-diabetes, PR (95% CI) |                     |                     |
|-----------------------------------------------------------------|-----------------------|---------------------|---------------------|---------------------------|---------------------|---------------------|
|                                                                 | Model 2               | Model 3             | Model 4             | Model 2                   | Model 3             | Model 4             |
| <b>Individual level</b>                                         |                       |                     |                     |                           |                     |                     |
| <b>Age in years, (ref: 18-34)</b>                               |                       |                     |                     |                           |                     |                     |
| 35-39                                                           | 1.87 (1.51-2.33)***   | 1.79 (1.44-2.23)*** | 1.81 (1.45-2.25)*** | 1.21 (1.02-1.43)*         | 1.19 (1.00-1.40)*   | 1.20 (1.01-1.42)*   |
| 40-44                                                           | 2.46 (1.94-3.11)***   | 2.33 (1.85-2.94)*** | 2.38 (1.88-3.00)*** | 1.23 (1.01-1.49)*         | 1.20 (0.99-1.46)    | 1.23 (1.02-1.49)*   |
| 45-49                                                           | 2.57 (2.03-3.26)***   | 2.32 (1.84-2.92)*** | 2.39 (1.90-3.01)*** | 1.25 (1.05-1.49)*         | 1.18 (0.99-1.41)    | 1.22 (1.03-1.46)*   |
| 50-54                                                           | 3.40 (2.64-4.38)***   | 3.10 (2.41-3.99)*** | 3.20 (2.48-4.11)*** | 1.15 (0.91-1.45)          | 1.10 (0.88-1.38)    | 1.13 (0.90-1.42)    |
| 55-59                                                           | 2.97 (2.32-3.81)***   | 2.60 (2.04-3.30)*** | 2.71 (2.13-3.44)*** | 1.31 (1.05-1.63)*         | 1.22 (0.97-1.52)    | 1.26 (1.01-1.58)*   |
| 60-64                                                           | 3.34 (2.64-4.22)***   | 2.98 (2.36-3.77)*** | 3.12 (2.47-3.93)*** | 1.27 (1.01-1.60)*         | 1.21 (0.96-1.52)    | 1.26 (1.00-1.59)*   |
| ≥65                                                             | 2.98 (2.31-3.84)***   | 2.63 (2.06-3.37)*** | 2.76 (2.15-3.54)*** | 1.25 (1.01-1.53)*         | 1.17 (0.95-1.44)    | 1.21 (0.99-1.49)    |
| <b>Sex, (ref: women)</b>                                        | 1.22 (1.06-1.42)*     | 1.19 (1.03-1.38)*   | 1.17 (1.01-1.36)*   | 1.01 (0.90-1.13)          | 1.00 (0.89-1.12)    | 0.98 (0.87-1.10)    |
| <b>Body Mass Index (kg/m<sup>2</sup>), (ref: normal weight)</b> |                       |                     |                     |                           |                     |                     |
| Underweight (<18.5)                                             | 0.73 (0.60-0.91)***   | 0.81 (0.65-1.00)    | 0.80 (0.65-0.99)*   | 0.92 (0.80-1.07)          | 0.96 (0.83-1.11)    | 0.95 (0.82-1.11)    |
| Overweight (25-29.9)                                            | 1.47 (1.27-1.69)***   | 1.31 (1.14-1.51)*** | 1.30 (1.13-1.50)*** | 1.15 (1.02-1.31)*         | 1.09 (0.96-1.23)    | 1.08 (0.95-1.22)    |
| Obese (≥30)                                                     | 1.78 (1.43-2.23)***   | 1.43 (1.15-1.79)*** | 1.42 (1.14-1.78)*** | 1.45 (1.18-1.79)***       | 1.28 (1.04-1.58)*** | 1.28 (1.04-1.58)*   |
| <b>Level of education (ref: higher education)</b>               |                       |                     |                     |                           |                     |                     |
| No education, preschool                                         | 0.69 (0.55-0.87)***   | 0.99 (0.79-1.26)    | 0.93 (0.74-1.17)    | 0.99 (0.82-1.20)          | 1.23 (1.00-1.51)*   | 1.15 (0.94-1.41)    |
| Primary                                                         | 0.91 (0.74-1.11)      | 1.22 (0.99-1.50)    | 1.16 (0.94-1.42)    | 0.92 (0.78-1.09)          | 1.10 (0.92-1.31)    | 1.04 (0.87-1.23)    |
| Secondary                                                       | 0.97 (0.80-1.16)      | 1.11 (0.92-1.34)    | 1.08 (0.89-1.30)    | 0.98 (0.83-1.15)          | 1.08 (0.92-1.27)    | 1.04 (0.88-1.23)    |
| <b>Currently working, (ref: no)</b>                             | 0.72 (0.62-0.84)***   | 0.79 (0.68-0.92)*   | 0.80 (0.69-0.94)*   | 0.95 (0.84-1.07)          | 0.99 (0.87-1.11)    | 1.01 (0.90-1.14)    |
| <b>Hypertension, (ref: no)</b>                                  | 1.48 (1.30-1.68)***   | 1.45 (1.27-1.65)*** | 1.47 (1.29-1.67)*** | 0.98 (0.87-1.10)          | 0.96 (0.85-1.09)    | 0.98 (0.87-1.10)    |
| <b>Household level</b>                                          |                       |                     |                     |                           |                     |                     |
| <b>Wealth quintile, (ref: lowest)</b>                           |                       |                     |                     |                           |                     |                     |
| Second                                                          |                       | 1.06 (0.81-1.38)    | 1.03 (0.79-1.35)    |                           | 0.85 (0.69-1.05)    | 0.84 (0.68-1.03)    |
| Middle                                                          |                       | 1.31 (1.02-1.69)*** | 1.24 (0.96-1.61)    |                           | 0.98 (0.80-1.20)    | 0.94 (0.77-1.15)    |
| Fourth                                                          |                       | 1.78 (1.38-2.31)*** | 1.61 (1.24-2.10)*** |                           | 1.28 (1.05-1.56)*   | 1.17 (0.95-1.43)    |
| Highest                                                         |                       | 2.56 (2.00-3.28)*** | 2.22 (1.71-2.87)*** |                           | 1.59 (1.30-1.96)*** | 1.37 (1.11-1.69)*** |
| <b>Community level</b>                                          |                       |                     |                     |                           |                     |                     |
| <b>Place of residence, (ref: rural)</b>                         |                       |                     |                     |                           |                     |                     |
| <b>Administrative division, (ref: Barishal)</b>                 |                       |                     | 1.02 (0.89-1.18)    |                           |                     | 1.00 (0.88-1.14)    |
| Chattogram                                                      |                       |                     | 0.98 (0.74-1.29)    |                           |                     | 0.82 (0.66-1.03)    |
| Dhaka                                                           |                       |                     | 1.31 (1.02-1.70)*   |                           |                     | 1.18 (0.94-1.49)    |
| Khulna                                                          |                       |                     | 0.77 (0.59-1.01)    |                           |                     | 0.59 (0.46-0.77)*** |
| Mymensingh                                                      |                       |                     | 0.94 (0.70-1.26)    |                           |                     | 0.74 (0.59-0.93)*** |
| Rajshahi                                                        |                       |                     | 0.90 (0.67-1.20)    |                           |                     | 0.57 (0.43-0.75)*** |
| Rangpur                                                         |                       |                     | 0.67 (0.50-0.90)*** |                           |                     | 0.54 (0.42-0.71)*** |
| Sylhet                                                          |                       |                     | 0.99 (0.72-1.37)    |                           |                     | 0.73 (0.56-0.94)*** |

PR= prevalence ratio; CI= confidence interval.

Notes: Model 1 was null model without any covariates. The summary of this model is presented in Table 3.

\*p value <0.05

\*\*\*p value <0.01

## **4. Discussion**

### **4.1. Summary of key findings**

Diabetes and prediabetes affect a substantial proportion of the Bangladeshi population.

Based on data from the latest BDHS 2017-18, over one-quarter of individuals aged 18 years and older had diabetes or prediabetes in Bangladesh, representing in excess of 25 million individuals in 2020. Factors associated with diabetes were age, sex, BMI, wealth quintile, employment status, hypertension and administrative division of the country but not the place of residence (urban /rural) or level of education. They confirm a continuing high burden of diabetes and prediabetes in Bangladesh.

### **4.2. Comparison with existing literature**

The prevalence of diabetes we have found is higher than the overall age-adjusted diabetes prevalence of 11.3% in the Southeast Asian region, estimated by the IDF in 2019[4]. The IDF has identified that the countries with the largest numbers of adults with diabetes aged 20–79 years in 2019 in the region are China (116 million cases) and India (77 million cases)[4]. In 2019, the IDF ranked Bangladesh 10<sup>th</sup> of countries with the highest number of adults (20–79 years) with diabetes (8.4 million cases), and it is expected to be ranked 9<sup>th</sup> in 2030 and 2045[4]. Our data confirm that cases in Bangladesh are very high. In our analysis, over 1 in 10 adults (18+) had diabetes, representing an estimated 14 million individuals in 2020. This large number of cases in Bangladesh indicate that it is one of the leading countries for diabetes burden in Southeast Asian region and underlines the urgent need for policies supporting the rollout of diabetes prevention in this country.

Our study undertook an identical methodological approach, (e.g. anthropometric measurements and fasting blood samples), to the 2011 study and demonstrated that the prevalence of diabetes has increased markedly in Bangladesh over 7 years[5]. Similar increasing trends of diabetes have been observed in other Southeast Asian countries[25]. However, the extent to which changes in traditional diabetes risk factors can explain the increasing trends in prevalence of diabetes in this setting needs further investigation. A higher diabetes prevalence suggests that despite greater global awareness of diabetes and interventions for improved non-communicable disease management in primary health care[26], diabetes in Bangladesh is increasing. It suggests that health promotion may be failing in the face of dietary and lifestyles patterns that result in diabetes. Thus, more resources are needed to be invested in primary health care to address the prevention of diabetes in Bangladesh.

Our estimates suggest that the prevalence of prediabetes has decreased in Bangladesh in the 7 years between 2011 and 2017/18 [5]. Prediabetes is important as it is a time when micro-vascular complications are occurring, often without people knowing they are glucose intolerant. The literature shows that up to 40.5% of individual with prediabetes convert to diabetes during follow-up[27]. A high conversion rate of prediabetes to diabetes is indicative of the potential for an uncontrolled increase in prevalence of diabetes. The observation that diabetes prevalence has increased but prediabetes has decreased in 7 years may indicate higher than expected conversion rates possibly due to rapidly changing environmental conditions [27]. Changes in insulin resistance or beta cell activity (or both) may contribute that need further investigation in the Bangladeshi population. Further declines in prediabetes may be achievable as it is a reversible condition through lifestyle modification[28]. The policy

implication is that diabetes prevention programmes need to continue targeting those with prediabetes to help delay this preventable disease early in its pathogenesis, reducing disease burden[29].

There was a positive association between increasing age and risk of diabetes in Bangladesh, consistent with well-established relationships in the literature [4, 30]. The implication of this is that with increasing life expectancy in Bangladesh (current life expectancy at birth 72.3 years)[31] the increasing numbers of older people will result in even more cases and a higher burden of diabetes.

Consistent with our study, world literature shows that obesity is a leading risk factor for type 2 diabetes[32]. However, the association between obesity and diabetes is complicated as obesity is also related to socioeconomic status. We observed a significantly higher prevalence of diabetes in the highest wealth quintile than the lowest wealth quintile. A possible explanation is that those in the highest wealth quintile in developing economies use disposable income to purchase western, high energy food ('nutrition transition') and avoid physically demanding tasks as symbols of status[33]. This results in obesity which in turn is associated with diabetes. Increasing obesity in Bangladesh[11] may also be due to reduced physical activity associated with changing traditional agricultural/domestic works replaced by technology, watching television and using internet. Conversely, in high-income countries, high socioeconomic status is not associated with obesity[34]. A reason may be that in higher-income countries, high socioeconomic status individuals use their resources to eat healthy diets and take regular exercise (e.g. personal trainers). Irrespective of the explanation, increasing obesity in Bangladesh suggests that diabetes will increase further with its

strengthening economy. A further policy implication is that interventions for diabetes prevention in Bangladesh need to focus on obesity in particular, by reducing the consumption of unhealthy diets and increasing physical activity. This should be given priority as there is evidence that even modest weight reduction of 5-7% in high risk individuals result a declines in the incidence of diabetes[28].

In Bangladesh, adults' fat distribution rather than BMI per se, may result in a pattern of metabolic abnormalities associated diabetes. Central obesity and insulin resistance are higher in the people from South Asian (India, Pakistan, Bangladesh) origin than other ethnic groups of similar BMI[35]. Further, the risk may accumulate over the life-course as these patterns have been found to be in South Asians from birth [36]. Recent studies suggest that South Asians not only have high rates of insulin resistance, but an early decline in  $\beta$ -cell function as well a phenomenon with genetic underpinnings [34, 37]. These observations need further investigation in the Bangladeshi population to see if they contribute to the substantial diabetes prevalence we have observed in 2017-18, in addition to traditional risk factors.

Our data also show that the prevalence of diabetes is higher in people with hypertension, which is in agreement with other studies[38, 39]. Hypertension is exacerbated by other risk factors such as obesity, advanced age and significantly contributes to micro and macrovascular complications resulting in renal failure[40] and cardiovascular disease[38]. Pathways through which these complications may occur include insulin resistance, inflammation and obesity[15]. The implication of the strong association of hypertension and diabetes is that efforts are needed in Bangladesh to delay or prevent comorbid hypertension in diabetes through frequent follow-up and aggressive management.

Three out of five people living with diabetes in Bangladesh did not know that they had it, and only a third were receiving appropriate treatment. Renewed efforts are needed to increase awareness, treatment, and control to improve diabetes outcomes. Obesogenic environments such as walkable neighbourhoods and encouraging healthy food choices in schools and cafeterias should be developed as interventions to address non-communicable diseases, including diabetes, in Bangladesh. However, there is evidence that the Bangladesh health care system, which is orientated to communicable diseases[41], is struggling to address non-communicable disease prevention adequately [42]. This is due to lifestyle changes resulting from the epidemiological transition and rapid urbanisation[42]. The Bangladesh government is making progress in achieving universal health coverage; however, barriers include large out-of-pocket expenditure [43]. It places a financial burden on households, and has the effect of preventing people from accessing care (health care is viewed as a ‘luxury’ not a ‘necessity’) or seeking alternative providers who are cheaper, but untrained and cause adverse effects[44]. These barriers may undermine diabetes prevention efforts. However, future health promotion policy needs to prioritise affordable, high quality public health programmes for the prevention and management of diabetes.

### **4.3. Methodological considerations**

The strengths of the study are that it used a large, nationally representative dataset suggesting the findings have external validity. A further strength of the study is that clinical variables including FBG, blood pressure and body weight and height were measured using high-quality techniques. The WHO criteria for the classification of diabetes and prediabetes were used while hypertension was defined using the seventh report of the Joint National Committee on Prevention, Detection, Evaluation, and Treatment of high blood pressure



criteria. Our multilevel mixed-effects Poisson regression corrects the problem of overestimation of effects size produced by conventional logistic regression employed in cross-sectional studies, and increased the precision of the findings. However, this was a cross-sectional study, which limits our ability to infer causal relationships among the risk factors. A further limitation was that diabetes medication use was self-reported. Dietary and physical activity data were not collected and so could not be controlled for in the analysis. In future, collection of diet and physical activity data, and measures of central obesity, insulin resistance and beta-cell function will help to elucidate causal mechanisms accounting for the increasing prevalence of diabetes, but declining prevalence of prediabetes, in Bangladesh.

#### **4.4. Implications of findings**

This study implies that efforts to control diabetes and prediabetes in Bangladesh need to be strengthened. Further investment of resources is needed to manage these conditions. Diabetes and prediabetes are preventable diseases through modification of diet and physical activities. Given that these are preventable diseases, Bangladesh needs to redouble efforts to implement diabetes prevention. This may require the health care system changes in which non-communicable disease prevention is prioritized and household medical care payments reviewed to reduce out-of-pocket expenses. These measures will be worth the investment as they will maximize access to high-quality public health programmes. A further implication of our analysis is that diabetes prevention should focus on reducing obesity and managing hypertension, particularly in men and those with disposable income. These factors were strongly associated with diabetes, suggesting that their management will bring the greatest benefits. Without effective preventive measures, diabetes will continue to increase in Bangladesh.

## **5. Conclusions**

Diabetes and prediabetes affect a substantial proportion (over one-quarter) of Bangladeshi adult population. These conditions remain a significant public health burden in Bangladesh. Continuing surveillance and effective prevention and control measures, with a particular focus on obesity reduction and hypertension management, are urgently needed.

## **Acknowledgement**

The authors thank to MEASURE DHS for granting access to the BDHS 2017-18 data.

## **Declaration of Competing of interest**

The authors declare no conflict of interest.

## **Authors' contribution**

Conception and design: RMI, MBH; Data curation and formal analysis: MNK, RMI, MBH, JR;

Data interpretation: RMI, MNK, JO, JR, EH, NK, MBH; Manuscript draft: RMI, JO, MNK, MBH;

Reviewed and edited the final manuscript: RMI, MNK, JO, JR, EH, NK, MBH.

## References

- [1] Lin X, Xu Y, X P, Jingya Xu J, Ding Y, Sun X, et al. Global, regional, and national burden and trend of diabetes in 195 countries and territories: an analysis from 1990 to 2025. *Nature*. 2020;10:14790.
- [2] Baena-Díez JM, Peñafiel J, Subirana I, Ramos R, Elosua R, Marín-Ibañez A, et al. Risk of cause-specific death in individuals with diabetes: a competing risks analysis. *Diabetes Care*. 2016;39:1987-95.
- [3] Saeedi P, Petersohn I, Salpea P, Malanda B, Karuranga S, Unwin N, et al. Global and regional diabetes prevalence estimates for 2019 and projections for 2030 and 2045: Results from the International Diabetes Federation Diabetes Atlas. *Diabetes research and clinical practice*. 2019;157:107843.
- [4] International Diabetes Federation. IDF Diabetes Atlas, 9th edn. Brussels. Belgium: 2019. Available at: <https://www.diabetesatlas.org>, accessed 18 November 20202019.
- [5] Akter S, Rahman MM, Abeb SK, Sultanac P. Prevalence of diabetes and prediabetes and their risk factors among Bangladeshi adults: a nationwide survey. *Bull World Health Organ*. 2014;92:204–13A.
- [6] National Institute of Population Research and Training (NIPORT) Ma, and ICF International, . Bangladesh Demographic andHealth Survey 2011. Dhaka, Bangladesh and Calverton, Maryland, USA:NIPORT, Mitra and Associates, and ICF International2013.
- [7] Research NIoP, Training - NIPORT, Health Mo, Family Welfare, ICF. Bangladesh Demographic and Health Survey 2017-18. Dhaka, Bangladesh: NIPORT/ICF; 2020.
- [8] Saquib N, Saquib J, Ahmed T, Khanam MA, Cullen MR. Cardiovascular diseases and type 2 diabetes in Bangladesh: a systematic review and meta-analysis of studies between 1995 and 2010. *BMC public health*. 2012;12:434.
- [9] Afroz A, Habib SH, Chowdhury HA, Paul D, Shahjahan Md, Hafez A, et al. Healthcare cost of type 2 diabetes mellitus in Bangladesh: a hospital-based study. *Int J Diabetes Dev Ctries*. 2016;36:235-41.
- [10] Zimmet PZ, Magliano DJ, Herman WH, Shaw JE. Diabetes: a 21st century challenge. *Lancet Diabetes Endocrinol*. 2014;2:56-64.
- [11] Banik S, Rahman M. Prevalence of overweight and obesity in Bangladesh: a systematic review of the literature. *Current obesity reports*. 2018;7:247-53.
- [12] Suwannaphant K, Laohasiriwong W, Puttanapong N, Saengsuwan J, Phajan T. Association between Socioeconomic Status and Diabetes Mellitus: The National

Socioeconomics Survey, 2010 and 2012. J Clin Diagn Res. 2017;11:LC18–LC22.

[13] Group DPPR. Reduction in the incidence of type 2 diabetes with lifestyle intervention or metformin. The New England journal of medicine. 2002;346.

[14] Tsimihodimos V, Gonzalez-Villalpando C, Meigs JB, Ferrannini E. Hypertension and Diabetes Mellitus. Hypertension. 2018;71:422-8.

[15] Cheung BM, Li C. Diabetes and hypertension: is there a common metabolic pathway? Current atherosclerosis reports. 2012;14:160-6.

[16] Perkovic V, Huxley R, Wu Y, Prabhakaran D, S M. The Burden of Blood Pressure-Related Disease A Neglected Priority for Global Health. Hypertension. 2007;50:991-7.

[17] United Nations, Department of Economic and Social Affairs, Population Division.

World Population Prospects 2019: Highlights (ST/ESA/SER.A/423), available at:

[https://population.un.org/wpp/Publications/Files/WPP2019\\_Highlights.pdf](https://population.un.org/wpp/Publications/Files/WPP2019_Highlights.pdf) accessed on 24 Jan 2021. 2019.

[18] World Health Organization. Definition and diagnosis of diabetes mellitus and intermediate hyperglycaemia: report of a WHO/IDF consultation. 2006.

[19] Chobanian AV, Bakris GL, Black HR, Cushman WC, Green LA, Izzo Jr JL, et al. The seventh report of the joint national committee on prevention, detection, evaluation, and treatment of high blood pressure: the JNC 7 report. Jama. 2003;289:2560-71.

[20] Rutsein SO, Johnson K. The DHS Wealth Index. DHS Comparative Reports No. 6. . Calverton, Maryland, USA: ORC Macro. Available at

<http://dhsprogram.com/publications/publication-cr6-comparative-reports.cfm>. Accessed November 07, 2015.2004.

[21] Barros AJ, Hirakata VN. Alternatives for logistic regression in cross-sectional studies: an empirical comparison of models that directly estimate the prevalence ratio. BMC medical research methodology. 2003;3:21.

[22] Tamhane AR, Westfall AO, Burkholder GA, Cutter GR. Prevalence odds ratio versus prevalence ratio: choice comes with consequences. Statistics in medicine. 2016;35:5730-5.

[23] O'Connell AA, McCoach DB. Multilevel modeling of educational data: IAP; 2008.

[24] Von Elm E, Altman DG, Egger M, Pocock SJ, Gøtzsche PC, Vandenbroucke JP. The Strengthening the Reporting of Observational Studies in Epidemiology (STROBE) statement: guidelines for reporting observational studies. Annals of internal medicine. 2007;147:573-7.

[25] Collaboration NRF. Worldwide trends in diabetes since 1980: a pooled analysis of 751 population-based studies with 4.4 million participants. . Lancet. 2016;387.

[26] Zaman M, Ullah A, Bhuiyan M, Karim M. Moniruzzaman and Rahman SMA.

Noncommunicable Disease Prevention and Control Situation in a Primary Health Care Setting of Bangladesh: Design and Baseline Findings of an Intervention Chronic Dis Int. 2016;3:1021.

[27] Mohan V, Deepa M, Anjana RM, Lanthorn H, Deepa R. Incidence of diabetes and pre-diabetes in a selected urban south Indian population (CUPS-19). . J Assoc Physicians India. 2008;56:152-7.

[28] Knowler WC, Barrett-Connor E, Fowler SE, Hamman RF, Lachin JM, Walker EA, et al. Reduction in the incidence of type 2 diabetes with lifestyle intervention or metformin. The New England journal of medicine. 2002;346:393-403.

[29] Tuso P. Prediabetes and lifestyle modification: time to prevent a preventable disease. The Permanente Journal. 2014;18:88.

[30] Chen Y, Zhang X-P, Yuan J, Cai B, Wang X-L, Wu X-L, et al. Association of body mass index and age with incident diabetes in Chinese adults: a population-based cohort study. BMJ open. 2018;8:e021768.

[31] World Bank. <https://data.worldbank.org/indicator/SP.POP.TOTL?locations=BD>. 2021.

[32] Barnes AS, Coulter SA. The Epidemic of Obesity and Diabetes Trends and Treatments Tex Heart Inst J. 2011;38:142-4.

[33] Pampel FC, Denney JT, Krueger PM. Obesity, SES, and Economic Development: A Test of the Reversal Hypothesis. Social Science and Medicine. 2012;74:1073-81.

[34] Kanaya AM, Herrington D, Vittinghoff E, Ewing SK, Liu K, Blaha MJ, et al. Understanding the high prevalence of diabetes in US south Asians compared with four racial/ethnic groups: the MASALA and MESA studies. Diabetes care. 2014;37:1621-8.

[35] McKeigue PM. Metabolic consequences of obesity and body fat pattern: lessons from migrant studies. Ciba Foundation Symposium: Wiley Online Library; 1996. p. 54-63.

[36] Stanfield KM, Wells JC, Fewtrell MS, Frost C, Leon DA. Differences in body composition between infants of South Asian and European ancestry: the London Mother and Baby Study. International journal of epidemiology. 2012;41:1409-18.

[37] Staimez LR, Weber MB, Ranjani H, Ali MK, Echouffo-Tcheugui JB, Phillips LS, et al. Evidence of reduced  $\beta$ -cell function in Asian Indians with mild dysglycemia. Diabetes care. 2013;36:2772-8.

[38] Lastra G, Syed S, Kurukulasuriya LR, Manrique C, Sowers JR. Type 2 diabetes mellitus and hypertension: an update. Endocrinology and Metabolism Clinics. 2014;43:103-22.

[39] Suh D-C, Kim C-M, Choi I-S, Plauschinat CA, Barone JA. Trends in blood pressure control and treatment among type 2 diabetes with comorbid hypertension in the United

States: 1988–2004. *Journal of hypertension*. 2009;27:1908-16.

[40] Simonson DC. Etiology and prevalence of hypertension in diabetic patients. *Diabetes care*. 1988;11:821-7.

[41] Organization WH. Country Cooperation Strategy at a glance Bangladesh available at: [https://apps.who.int/iris/bitstream/handle/10665/136959/ccsbrief\\_bgd\\_en.pdf;jsessionid=74401C9C7EB811317CA07E636E6EA24B?sequence=1](https://apps.who.int/iris/bitstream/handle/10665/136959/ccsbrief_bgd_en.pdf;jsessionid=74401C9C7EB811317CA07E636E6EA24B?sequence=1) accessed on 25 January 2021. 2021.

[42] Riaz BK, Islam MZ, Islam AS, Zaman M, Hossain MA, Rahman MM, et al. Risk factors for non-communicable diseases in Bangladesh: findings of the population-based cross-sectional national survey 2018. *BMJ open*. 2020;10:e041334.

[43] Health Mo, Welfare F. Bangladesh national health accounts 1997–2012. Health Economics Unit, Ministry of Health and Family Welfare, Government of ...; 2015.

[44] Khan JA, Ahmed S, Sultana M, Sarker AR, Chakrovorty S, Rahman MH, et al. The effect of a community-based health insurance on the out-of-pocket payments for utilizing medically trained providers in Bangladesh. *International health*. 2020;12:287-98.
